# Supplementary material
Source: publisher figshare collection journal article supplement (https://acs.figshare.com/ndownloader/files/13710599)
Supplement: Supplementary file 1 [file 13710599]

## Supporting information

# ***Amorphous Iron and Cobalt Based Phosphate Nanosheets Supported on Ni Foam as Superior Catalysts for Hydrogen Evolution Reaction***

Cong Li, Xuanhao Mei, Frank Leung-Yuk Lam,\* and Xijun Hu\*

Department of Chemical and Biological Engineering, The Hong Kong University of Science and Technology, Clear Water Bay, Kowloon, Hong Kong

\* Corresponding Author. E-mail: kefrank@ust.hk; kexhu@ust.hk

## **Table of Contents**

1. Experimental Procedures
  - 1.1 Synthesis of  $\text{Fe}_{1-2x/3}\text{Co}_x\text{PO}_4$  nanosheets supported on Ni foam
  - 1.2 Materials characterization
  - 1.3 Electrochemical measurements
2. Supplementary Results

## 1. Experimental Procedures

### 1.1 Synthesis of $\text{Fe}_{1-2x/3}\text{Co}_x\text{PO}_4$ nanosheets supported on Ni foam

One piece of Ni foam was washed with ethanol, diluted HCl and deionized (DI) water several times before use. A colloidal chemical method was used for the catalyst synthesis. Typically, 1 mmol of  $\text{Fe}(\text{NO}_3)_3 \cdot 9\text{H}_2\text{O}$  and 1 mmol of  $\text{Co}(\text{NO}_3)_2 \cdot 6\text{H}_2\text{O}$  were dissolved in 10 mL OM under ultrasonication for 1 h. In the meantime, 3 mmol  $\text{Na}_2\text{HPO}_4$  was dissolved in 10 mL DI water under ultrasonication for 1 h. Then they were mixed and transferred into a 100 mL Teflon-lined autoclave with a piece of Ni foam partially immersed in it. The autoclave was sealed and heated in an oven at 150 °C for 24 h. The sample was then carefully washed with cyclohexane, ethanol and DI water several times. Finally, the sample was put into a furnace under the protection of Ar gas and heated at 200 °C to remove the remnant organic reagent.

### 1.2 Materials characterization

SEM measurements were performed on a JEOL-6700F scanning electron microscope with an accelerating voltage of 10 kV. XRD patterns were obtained on a PW1830 (Philips) Powder X-ray diffractometer fitted with Cu K $\alpha$  radiation. XPS measurements were carried out on a Physical Electronics 5600 multi-technique system with an exciting source of Al with the working power of 150 W. TEM measurements were performed on a JEM 2010F (JEOL) Transmission Electron Microscope with an acceleration voltage of 200 kV. The FT-IR experiment was carried out on a Vertex 70 Hyperion 1000 FTIR spectrometer in a KBr pellet, scanning from 4000 to 400  $\text{cm}^{-1}$ . The  $\text{N}_2$  adsorption-desorption measurements were conducted using an autosorb-1 surface area analyzer. And the specific surface area of samples were calculated using Brunauer-Emmett-Teller (BET) method.

### 1.3 Electrochemical measurements

A CHI 660D electrochemical analyzer (CH Instruments, Inc. USA) was utilized for all the electrochemical measurements. A typical three-electrode system including  $\text{Fe}_{1-2x/3}\text{Co}_x\text{PO}_4/\text{Ni}$  foam directly as the working electrode, a carbon rod as the counter electrode and a saturated calomel electrode (SCE) as the reference electrode was constructed for measurements. All potentials applied were calibrated to RHE following the equation:  $E(\text{RHE}) = E(\text{SCE}) + 1.068 \text{ V}$ . All linear-sweep voltammetry (LSV) curves were obtained in a scan rate of 5  $\text{mV s}^{-1}$  with 95% iR compensation. The durability test was conducted at a constant potential of -100 mV (vs. RHE) for over 20 h. EIS measurements were performed at a potential of -60 mV (vs. RHE) with the frequency range from  $10^5$  to  $10^{-1}$  Hz. The electrochemical active surface area (ECSA) measurements were completed by a cyclic voltammetry (CV) technique with the potential scanning range within open circuit potential (OCP)  $\pm$  0.05 V at different scan rates.

## 2. Supplementary Results

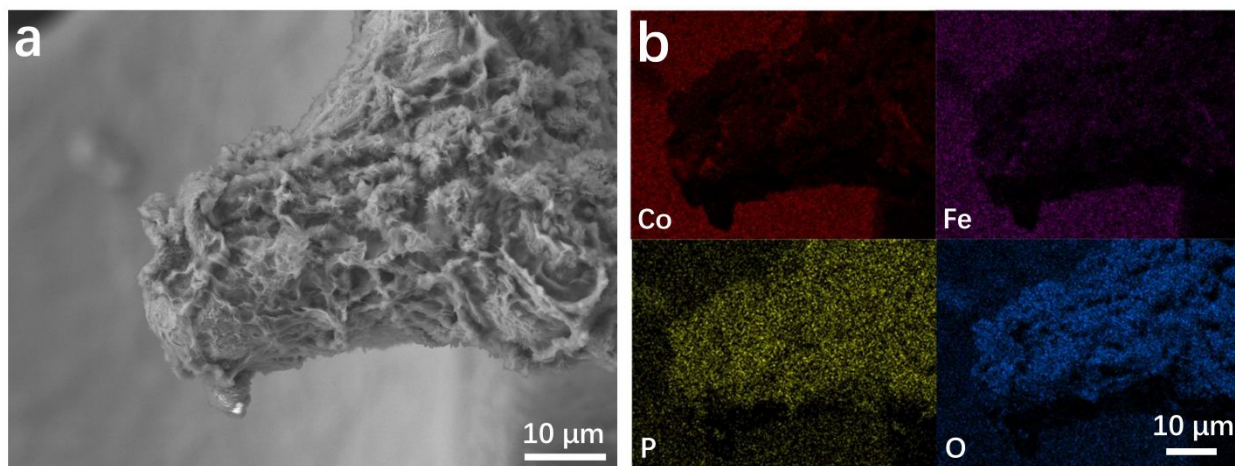

**Figure S1.** (a) SEM images of  $\text{Fe}_{1-2x/3}\text{Co}_x\text{PO}_4$  on Ni foam. (b) The elemental mapping of the Co, Fe, P and O elements of the catalyst.

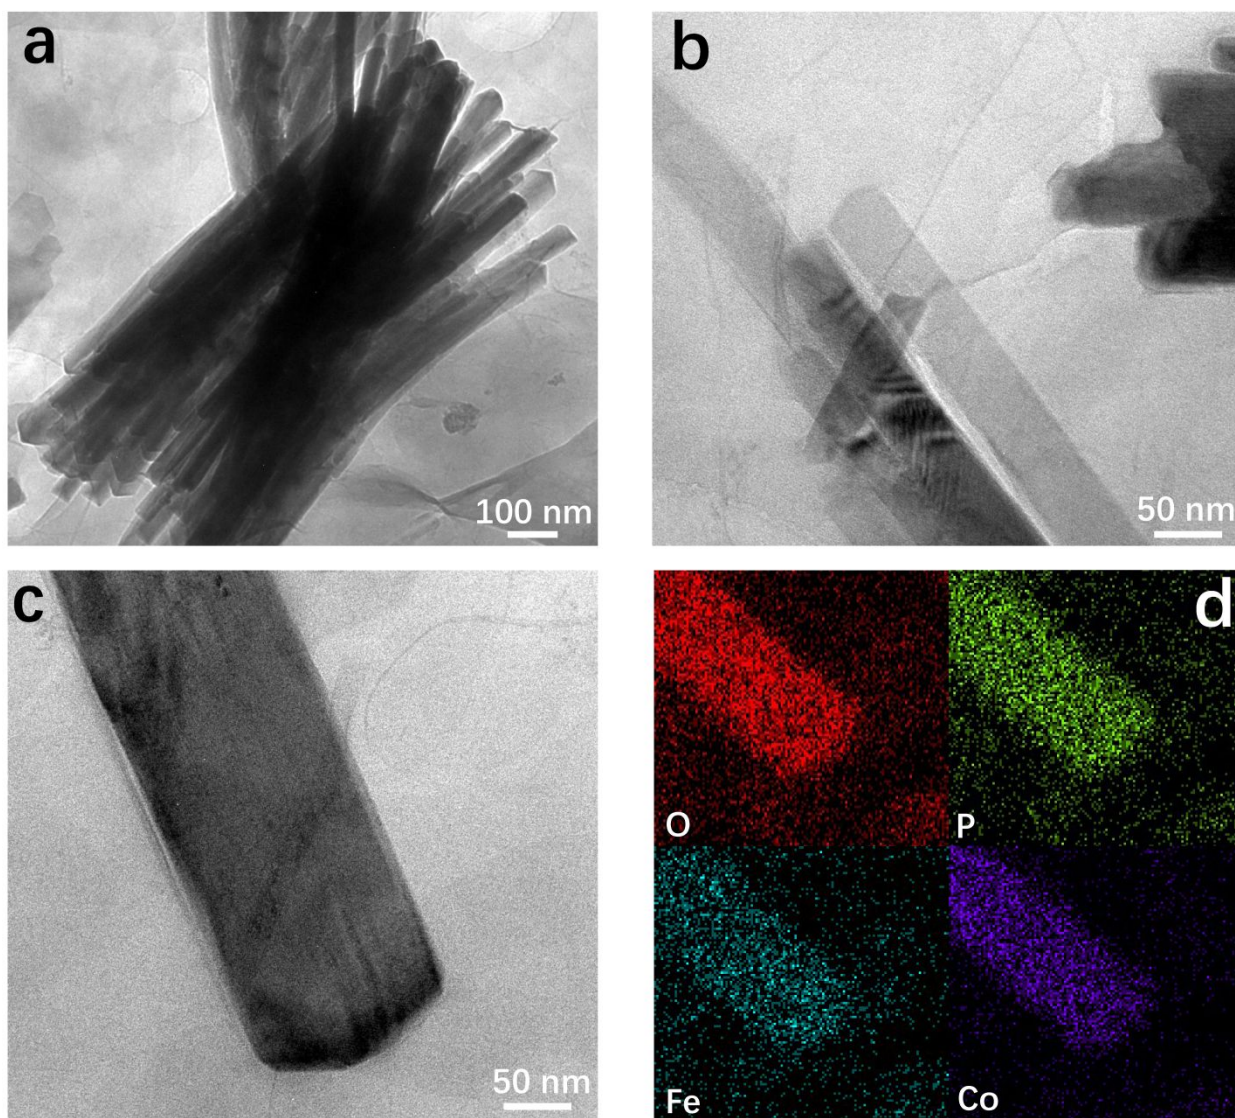

**Figure S2.** Transmission electron microscopy (TEM) images of (a) a bundle of  $\text{Fe}_{1-2x/3}\text{Co}_x\text{PO}_4$  nanorods and (b) single  $\text{Fe}_{1-2x/3}\text{Co}_x\text{PO}_4$  nanorod collected from the reaction solution. (c-d) TEM elemental mapping of a single nanorod.

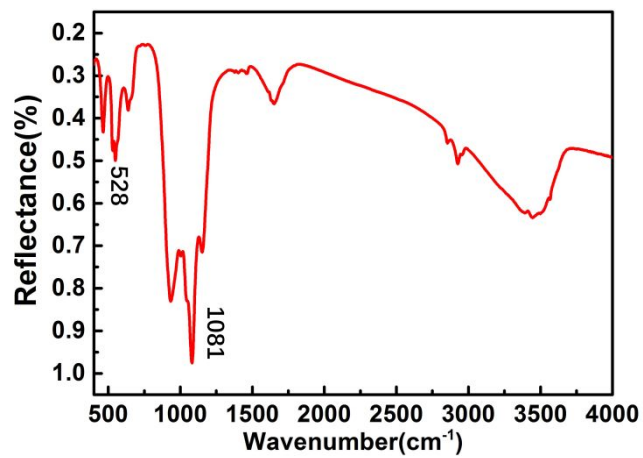

**Figure S3.** FTIR spectra of as-grown catalyst, confirming the existence of  $\text{PO}_4^{3-}$ .

**Table S1.** Comparison of HER efficiency of  $\text{Fe}_{1-2x/3}\text{Co}_x\text{PO}_4$  nanosheets on Ni foam with some representative catalysts reported recently.

| Catalysts                                                | Substrate    | Electrolyte | $\eta_{10}$ (mV)             | Tafel slope (mV/dec) | Reference |
|----------------------------------------------------------|--------------|-------------|------------------------------|----------------------|-----------|
| $\text{Fe}_{0.72}\text{Co}_{0.42}\text{PO}_4$ nanosheets | Ni foam      | 1.0 M KOH   | 77                           | 80.7                 | This work |
| $\text{Co}_2\text{P}$ nanorods                           | Ti foil      | 1.0 M KOH   | 152                          | N/A                  | [1]       |
| Porous Co-based film                                     | Au film      | 1.0 M KOH   | ~375                         | N/A                  | [2]       |
| WC                                                       | Ni foam      | 0.1 M KOH   | 220                          | N/A                  | [3]       |
| $\text{Co}(\text{S}_x\text{Se}_{1-x/2})$ nanoparticles   | Carbon fiber | 1.0 M KOH   | 122                          | 85.7                 | [4]       |
| $\text{MoS}_2\text{-Ni}_3\text{S}_2$ Heteronanorods      | Ni foam      | 1.0 M KOH   | 98                           | 61                   | [5]       |
| $\text{CdS-MoO}_3/\text{Ni}_3\text{S}_2$                 | Ni foam      | 1.0 M KOH   | 121                          | 110                  | [6]       |
| $\text{NiSe/Ni}_3\text{S}_2$                             | Ni foam      | 1.0 M KOH   | 92                           | 101.2                | [7]       |
| N-doped C dots / $\text{Ni}_3\text{S}_2$                 | Ni foam      | 1.0 M KOH   | 187 @ 20 $\text{mA cm}^{-2}$ | 127                  | [8]       |
| $\text{NiCo}_2\text{S}_4$ nanoflakes                     | Ni foam      | 1.0 M KOH   | 169                          | 97.1                 | [9]       |
| NiSe                                                     | Ni foam      | 1.0 M NaOH  | 177                          | 58.2                 | [10]      |



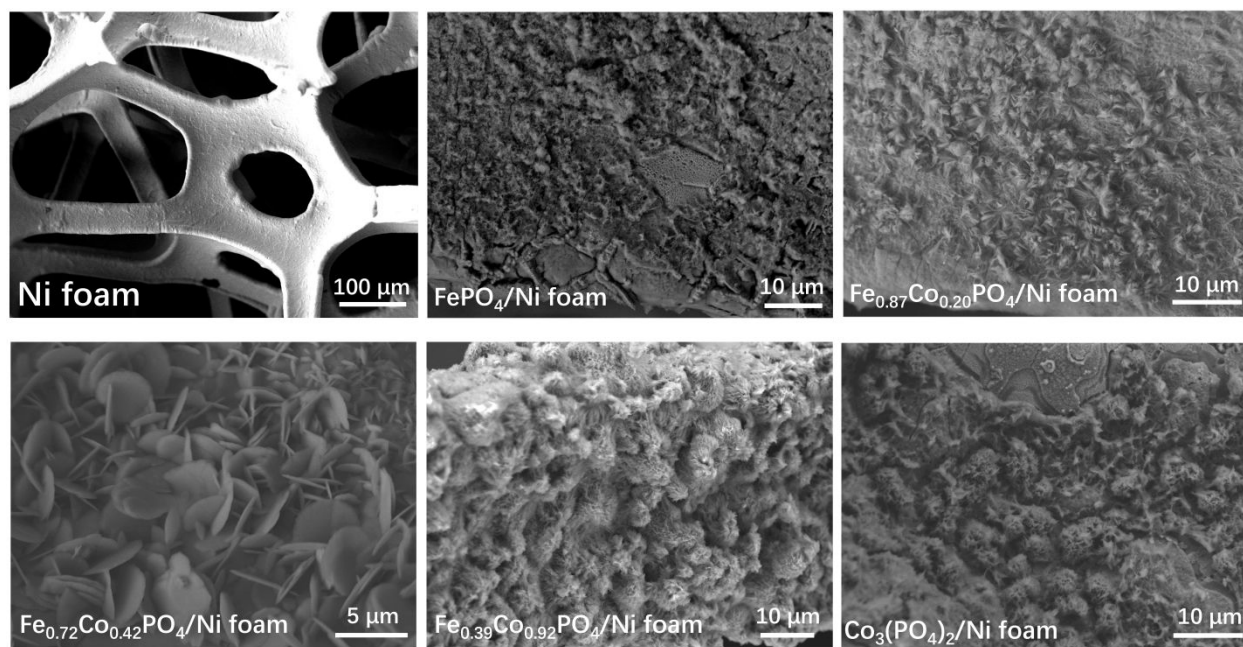

**Figure S4.** SEM images of Ni foam and various catalysts on Ni foam.

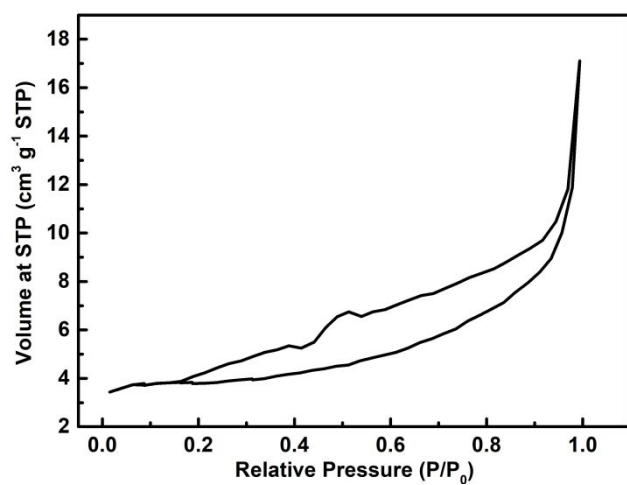

**Figure S5.** Typical  $N_2$  adsorption-desorption curve of  $Fe_{0.72}Co_{0.42}PO_4$  nanosheets/Ni foam.

**Table S2.** A summary of BET surface areas of different catalysts on Ni foam.

| Catalysts                                             | BET surface area<br>(m <sup>2</sup> g <sup>-1</sup> ) |
|-------------------------------------------------------|-------------------------------------------------------|
| FePO <sub>4</sub>                                     | 1.989                                                 |
| Fe <sub>0.87</sub> Co <sub>0.20</sub> PO <sub>4</sub> | 1.961                                                 |
| Fe <sub>0.72</sub> Co <sub>0.42</sub> PO <sub>4</sub> | 11.551                                                |
| Fe <sub>0.39</sub> Co <sub>0.92</sub> PO <sub>4</sub> | 1.237                                                 |
| Co <sub>3</sub> (PO <sub>4</sub> ) <sub>2</sub>       | 0.436                                                 |

**Table S3.** A summary of total resistance of the cell (R<sub>s</sub>) extracted from the Electrical Equivalent circuit model.

| Catalysts                                             | R <sub>s</sub> (Ohm) |
|-------------------------------------------------------|----------------------|
| FePO <sub>4</sub>                                     | 2.22                 |
| Fe <sub>0.87</sub> Co <sub>0.20</sub> PO <sub>4</sub> | 2.01                 |
| Fe <sub>0.72</sub> Co <sub>0.42</sub> PO <sub>4</sub> | 1.68                 |
| Fe <sub>0.39</sub> Co <sub>0.92</sub> PO <sub>4</sub> | 1.08                 |
| Co <sub>3</sub> (PO <sub>4</sub> ) <sub>2</sub>       | 1.90                 |
| Ni foam                                               | 1.73                 |



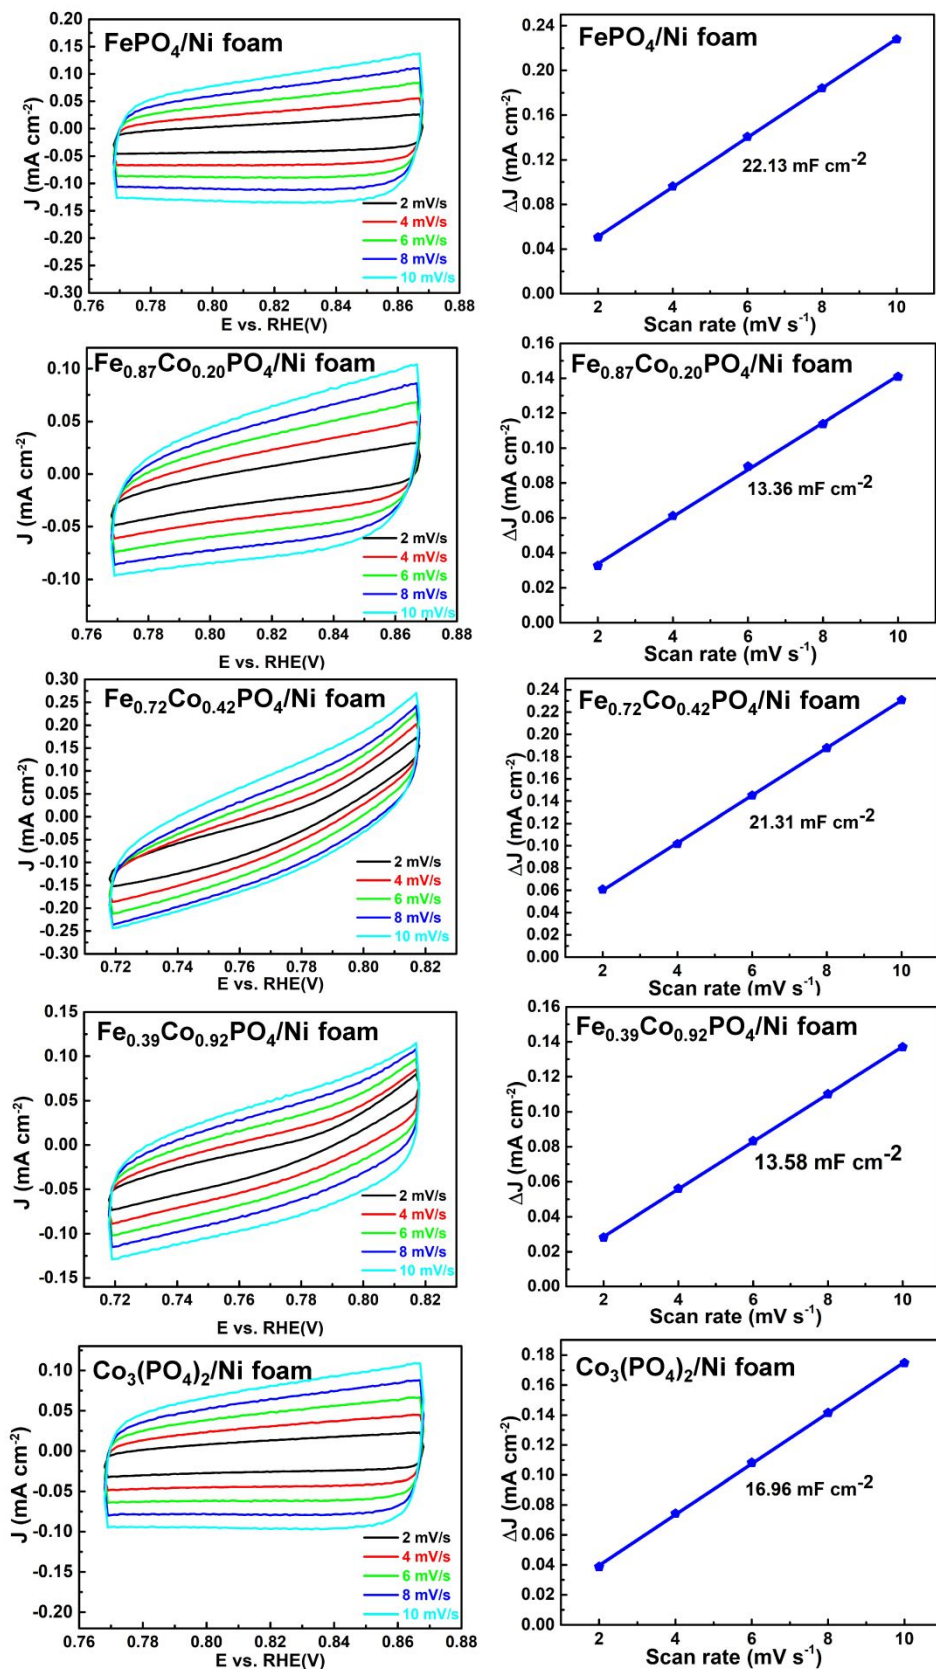

Figure S6. The summary of ECSA for different catalysts.

## Reference

1. Huang, Z.; Chen, Z.; Chen, Z.; Lv, C.; Humphrey, M. G.; Zhang, C., Cobalt Phosphide Nanorods as an Efficient Electrocatalyst for the Hydrogen Evolution Reaction. *Nano Energy* **2014**, *9*, 373-382.
2. Yang, Y.; Fei, H.; Ruan, G.; Tour, J. M., Porous Cobalt-Based Thin Film as a Bifunctional Catalyst for Hydrogen Generation and Oxygen Generation. *Adv. Mater.* **2015**, *27*, 3175-3180.
3. Zhu, J.; Sakaushi, K.; Clavel, G.; Shalom, M.; Antonietti, M.; Fellingner, T.-P., A General Salt-Templating Method To Fabricate Vertically Aligned Graphitic Carbon Nanosheets and Their Metal Carbide Hybrids for Superior Lithium Ion Batteries and Water Splitting. *J. Am. Chem. Soc.* **2015**, *137*, 5480-5485.
4. Fang, L.; Li, W.; Guan, Y.; Feng, Y.; Zhang, H.; Wang, S.; Wang, Y., Tuning Unique Peapod-Like  $\text{Co}(\text{S}_x\text{Se}_{1-x})_2$  Nanoparticles for Efficient Overall Water Splitting. *Adv. Funct. Mater.* **2017**, *27*, 1701008.
5. Yang, Y.; Zhang, K.; Lin, H.; Li, X.; Chan, H. C.; Yang, L.; Gao, Q.,  $\text{MoS}_2$ - $\text{Ni}_3\text{S}_2$  Heteronanorods as Efficient and Stable Bifunctional Electrocatalysts for Overall Water Splitting. *ACS Catal.* **2017**, *7*, 2357-2366.
6. Qu, S.; Huang, J.; Yu, J.; Chen, G.; Hu, W.; Yin, M.; Zhang, R.; Chu, S.; Li, C.,  $\text{Ni}_3\text{S}_2$  Nanosheet Flowers Decorated with CdS Quantum Dots as a Highly Active Electrocatalysis Electrode for Synergistic Water Splitting. *ACS Appl. Mater. Interfaces* **2017**, *9*, 29660-29668.
7. Zhang, F.; Pei, Y.; Ge, Y.; Chu, H.; Craig, S.; Dong, P.; Cao, J.; Ajayan, P. M.; Ye, M.; Shen, J., Controlled Synthesis of Eutectic  $\text{NiSe}/\text{Ni}_3\text{S}_2$  Self-Supported on Ni Foam: An Excellent Bifunctional Electrocatalyst for Overall Water Splitting. *Adv. Mater. Interfaces* **2018**, *5*, 1701507.
8. Rao, Y.; Ning, H.; Ma, X.; Liu, Y.; Wang, Y.; Liu, H.; Liu, J.; Zhao, Q.; Wu, M., Template-free Synthesis of Coral-like Nitrogen-doped Carbon Dots/ $\text{Ni}_3\text{S}_2$ /Ni Foam Composites as Highly Efficient Electrodes for Water Splitting. *Carbon* **2018**, *129*, 335-341.
9. Yu, J.; Lv, C.; Zhao, L.; Zhang, L.; Wang, Z.; Liu, Q., Reverse Microemulsion-Assisted Synthesis of  $\text{NiCo}_2\text{S}_4$  Nanoflakes Supported on Nickel Foam for Electrochemical Overall Water Splitting. *Adv. Mater. Interfaces* **2018**, *5*, 1701396.
10. Wu, H.; Lu, X.; Zheng, G.; Ho, G. W., Topotactic Engineering of Ultrathin 2D Nonlayered Nickel Selenides for Full Water Electrolysis. *Adv. Energy Mater.* **2018**, *8*, 1702704.
